# Supplementary material for: Accelerated signal propagation speed in human neocortical dendrites
Source: eLife. 2025 Apr 24;13:RP93781. doi: 10.7554/eLife.93781 (PMC12021416; doi:10.7554/eLife.93781)
Supplement: Supplementary file 1. [file elife-93781-supp1.xlsx]

## Sheet: Sheet1
Cell name	Length factor	Diameter factor
Human1	1.26	0.84
Human2	1.03	1
Human3	1.24	0.95
Human4	1.25	1.23
Human5	1.26	0.99
Rat1	1.05	1.12
Rat2	1.45	1.11
Rat3	1.67	1.33
Rat4	1.08	1.37
