# Supplementary material for: Accelerated signal propagation speed in human neocortical dendrites
Source: eLife. 2025 Apr 24;13:RP93781. doi: 10.7554/eLife.93781 (PMC12021416; doi:10.7554/eLife.93781)
Supplement: Supplementary file 2. — lavg is the average physical distance from which the respective experiments (per cell) were performed (zoom-in region in Figure 6A and B). davg is the average diameter at the same range.Lavg is the respective distances in cable units (L=lλ). Latency is the average latency measured at the experimental distance. Uniform cable parameters were used for all cells as in Figure 6. [file elife-93781-supp2.xlsx]

## Sheet: Sheet1
Cell name	lavg (µm)	Lavg	Latency (ms)	Velocity (m/s)
Human1	192	0.45	2.52	0.08
Human2	180	0.38	2.49	0.08
Human3	172.7	0.43	2.67	0.07
Human4	178	0.38	2.31	0.08
Human5	162.6	0.38	2.24	0.08
Rat1	163.9	0.45	3.1	0.05
Rat2	144.3	0.32	3.44	0.04
Rat3	170.4	0.36	3.65	0.05
Rat4	164.6	0.33	3.1	0.06
Mean human	177.1	0.4	2.45	0.08
Mean rat	160.8	0.37	3.32	0.05
