# Supplementary material for: Accelerated signal propagation speed in human neocortical dendrites
Source: eLife. 2025 Apr 24;13:RP93781. doi: 10.7554/eLife.93781 (PMC12021416; doi:10.7554/eLife.93781)
Supplement: Supplementary file 5. — Note the ranking (1-5) of the factors affecting EPSP latency (in ms units). Factors were ranked (1-5) based on the magnitude of their absolute coefficients, which provide insight into their relative contribution to the model. The model was fit using the Gamma family and included continuous factors that were standardized prior to fitting, as well as categorical factors (see comments above for the reference values). Each factor used in the model’s formula is highlighted in bold. The formula used for the model: latency ~species + distance + hybrid + radius + fitted. [file elife-93781-supp5.xlsx]

## Sheet: Sheet1
Factor affecting EPSP latency	Coefficient	Std. Error	z-value	p-value	95% Confidence Interval
Intercept	0.6698	0.009	77.910	<0.001	[0.653, 0.687]
1. distance of synapse from soma (z-score)	-0.2833	0.005	-61.165	<0.001	[-0.292, -0.274]
2. species (human vs. rat as reference)	0.0770	0.007	10.694	<0.001	[0.063, 0.091]
3. “hybrid cell” manipulation (compared to original cells)	-0.0751	0.007	-10.470	<0.001	[-0.089, -0.061]
4. radius (z-score)	0.0300	0.005	6.651	<0.001	[0.021, 0.039]
5. “Fitted”: Specific cable parameters (cell-based fitting vs. uniform parameters as reference	0.0298	0.007	4.233	<0.001	[0.016, 0.044]
