# Supplementary material for: Accelerated signal propagation speed in human neocortical dendrites
Source: eLife. 2025 Apr 24;13:RP93781. doi: 10.7554/eLife.93781 (PMC12021416; doi:10.7554/eLife.93781)
Supplement: Supplementary file 6. — This table presents evidence of significant interactions between the main factors affecting EPSP latency (see Supplementary file 5 for the non-interaction model). The model was fit using the Gamma family and included continuous factors that were standardized prior to fitting, as well as categorical factors (see Supplementary file 5 for the reference value). The formula used for the model (names match the factors from Supplementary file 5): latency ~species + distance + radius + (species × fitted × distance) + (species × hybrid × distance) + (species × radius). [file elife-93781-supp6.xlsx]

## Sheet: Sheet1
Factor affecting EPSP latency and their interactions	Coefficient	Std, Error	z-value	p-value	95% Confidence Interval
Intercept	0.5998	0.007	81.071	<0,001	[0,585, 0,614]
distance of synapse from soma (z-score)	-0.2379	0.01	-23.228	<0,001	[-0,258, -0,218]
species (human vs, rat as reference)	0.164	0.01	15.752	<0,001	[0,144, 0,184]
radius (z-score)	-0.0049	0.006	-0.799	0.424	[-0,017, 0,007]
radius × species (human)	0.0755	0.009	8.301	<0,001	[0,058, 0,093]
distance × species (human)	-0.069	0.013	-5.151	<0,001	[-0,095, -0,043]
distance × species (rat) × hybrid (True)	-0.0007	0.011	-0.065	0.948	[-0,022, 0,020]
distance × species (human) × hybrid (True)	-0.051	0.008	-6.512	<0,001	[-0,066, -0,036]
distance × species (rat) × fitted (True)	-0.004	0.011	-0.377	0.706	[-0,025, 0,017]
distance × species (human) × fitted (True)	0.0233	0.008	3.031	0.002	[0,008, 0,038]
